# Supplementary material for: Standard addition method for rapid, cultivation-independent quantification of Legionella pneumophila cells by qPCR in biotrickling filters
Source: Royal Society of Chemistry journal article supplement (doi:10.1039/d3an02207b), 2024-01-01
Supplement: d3an02207b1.pdf [file d3an02207b1.pdf]

# Standard addition method for rapid, cultivation-independent quantification of *Legionella pneumophila* cells by qPCR in biotrickling filters

Gerhard Schwaiger, Marco Matt, Philipp Streich, Sarah Bromann, Marcus Clauß, Martin Elsner, Michael Seidel\*

## Supporting Information:

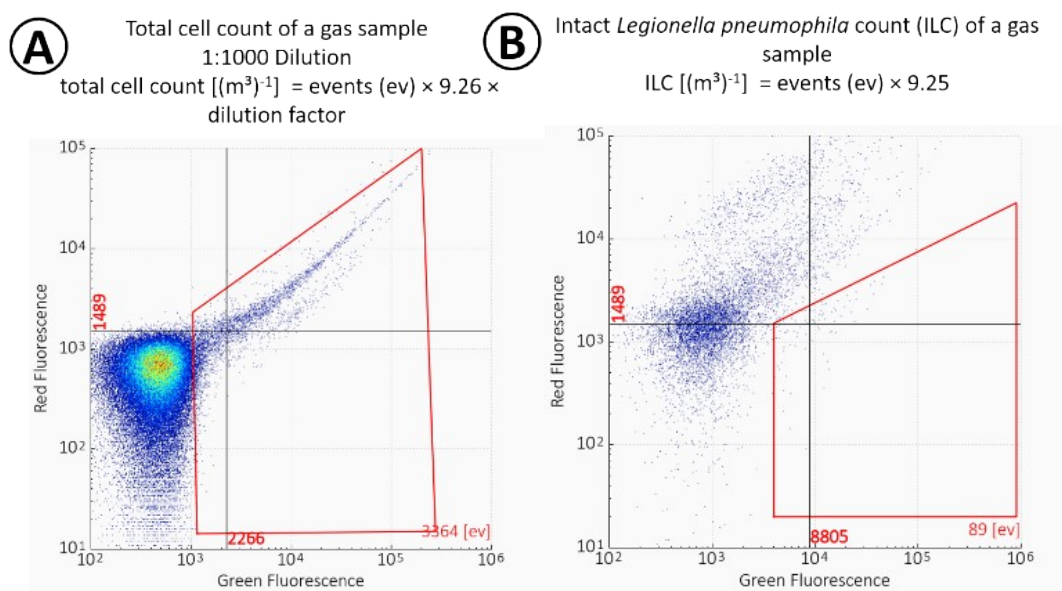

**Figure S1.** A: Received dot plots from the measurement of green and red fluorescence using the IMS-FCM method for the total cell count (TCC) in a biotrickling filter gas sample (sample 3). B: received dot plots from the measurement of green and red fluorescence using the IMS-FCM method for *L. pneumophila* Sg 1–15 biotrickling filter gas sample.

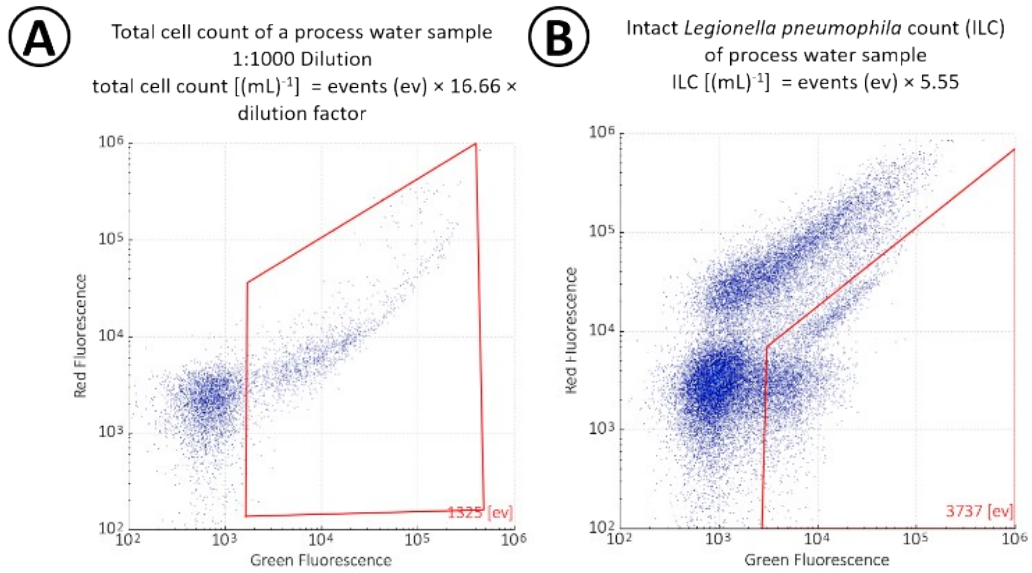

**Figure S2.** A: received dot plots from the measurement of green and red fluorescence using the IMS-FCM method for the total cell count (TCC) in a biotrickling filter process water sample (sample 2). B: received dot plots from the measurement of green and red fluorescence using the IMS-FCM method for *L. pneumophila* Sg 1–15 in a biotrickling filter process water sample.
